# Supplementary figures and images for: Genomic Differentiation during Speciation-with-Gene-Flow: Comparing Geographic and Host-Related Variation in Divergent Life History Adaptation in Rhagoletis pomonella
Source: MDPI journal article supplement (doi:10.3390/genes9050262), 2018-05-18

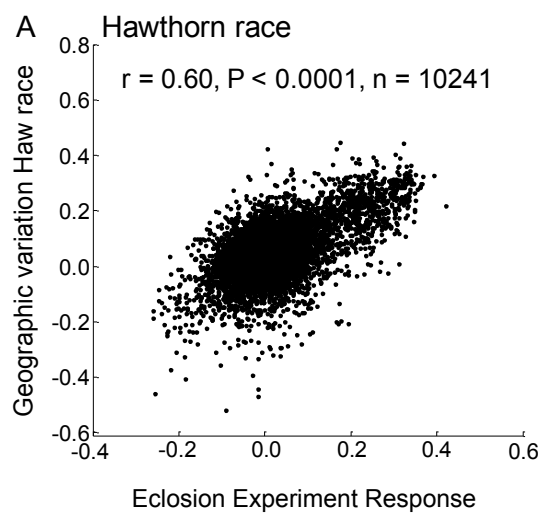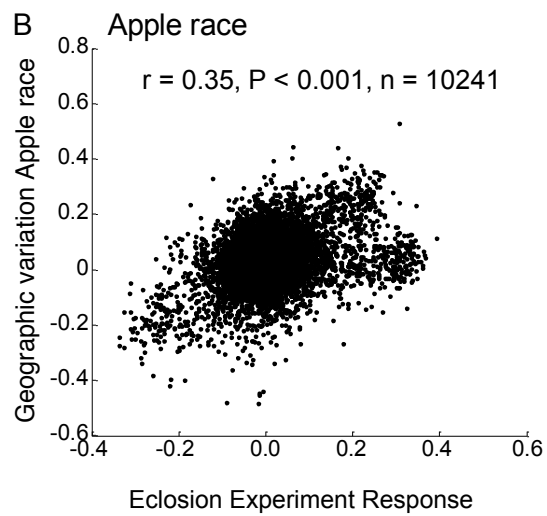

Supplement: s1 [file s1]

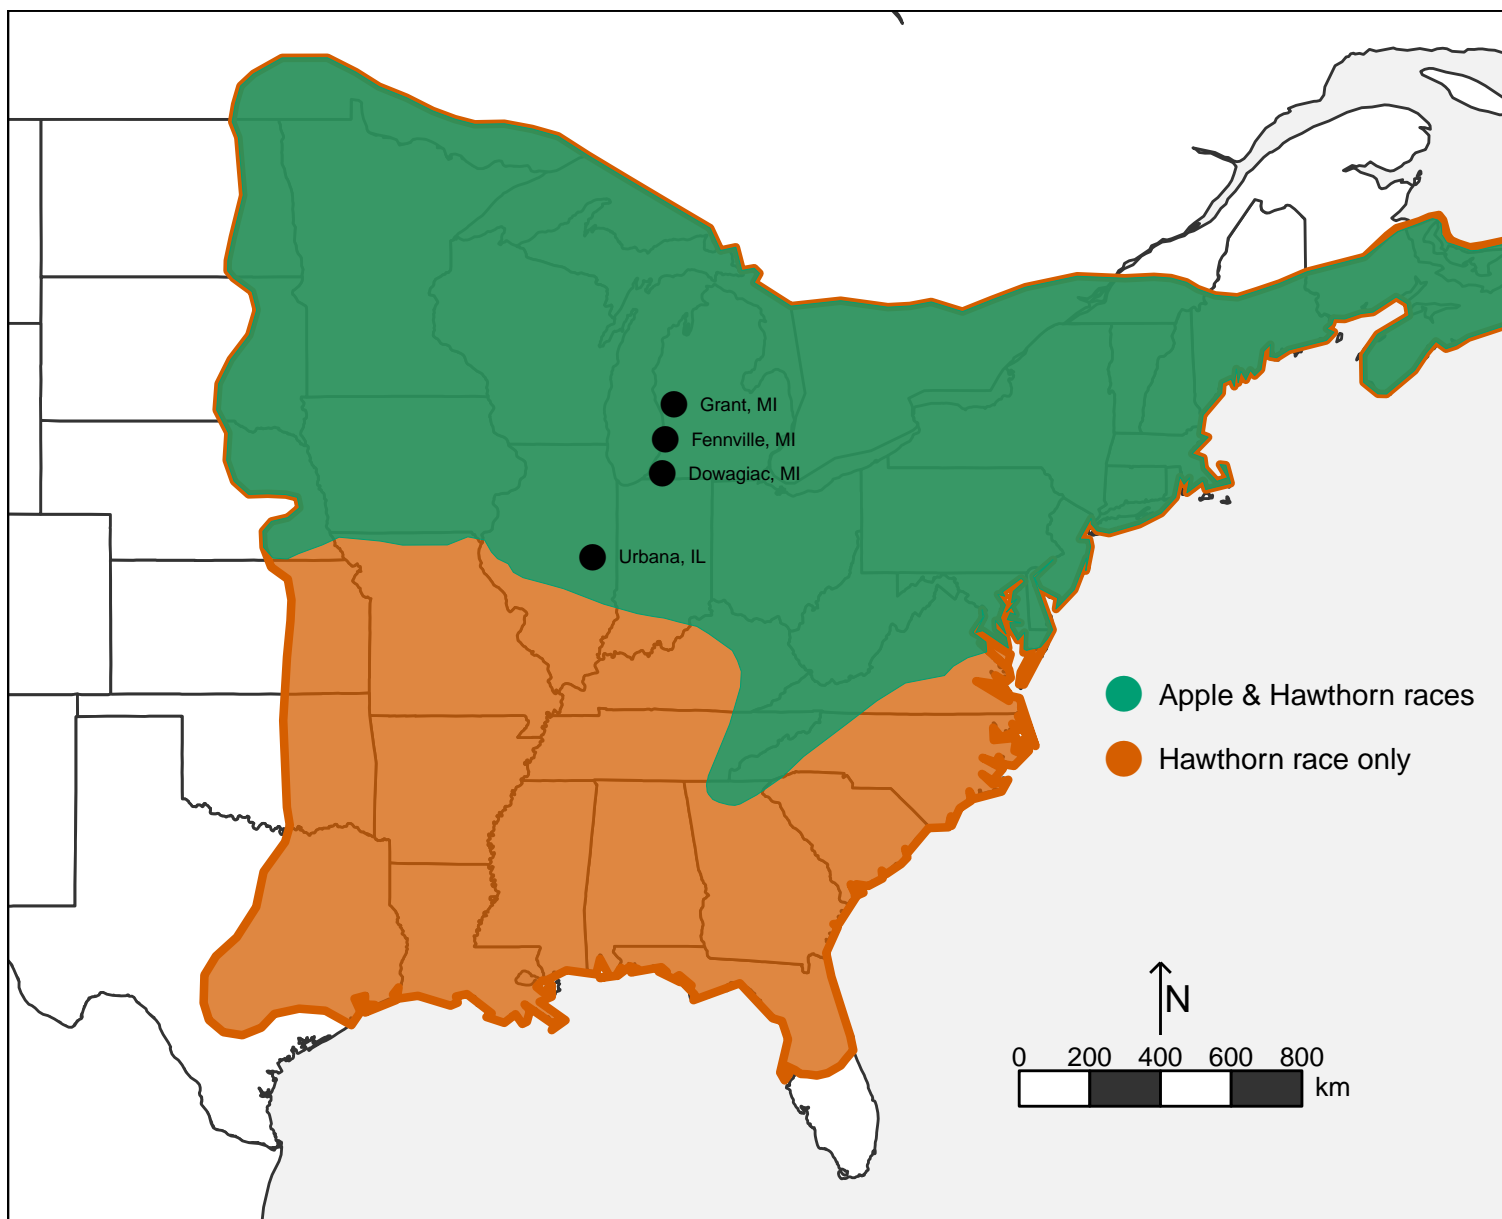

Supplement: s1 [file s1]
